# Supplementary material for: Periacetabular osteotomy with or without arthroscopic management in patients with hip dysplasia: study protocol for a multicenter randomized controlled trial
Source: Springer Nature journal article supplement (doi:10.1186/s13063-020-04592-9), 2020-08-18
Supplement: MOESM1 [file 18293710]

Appendix A

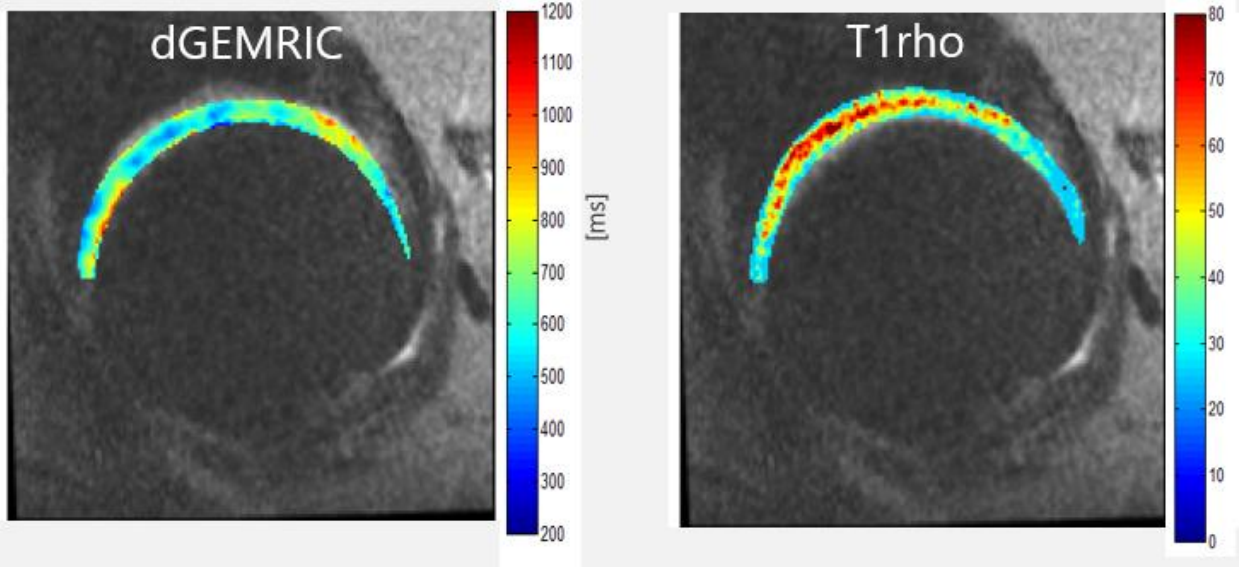

Figure 1. Demonstrating sensitivity of T1rho to proteoglycan content and change in the hip joint without the need of a contrast agent

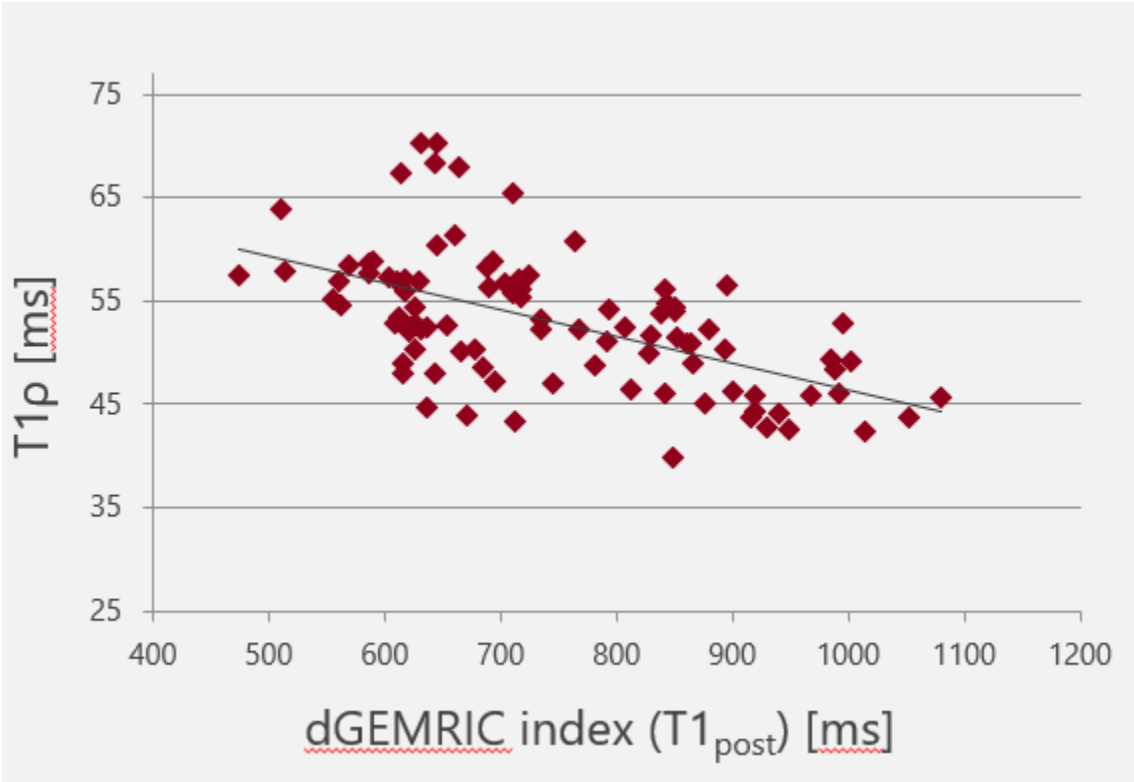

Figure 2. Spearman rank correlation coefficient (rho: -0.60, p<0.001\*)

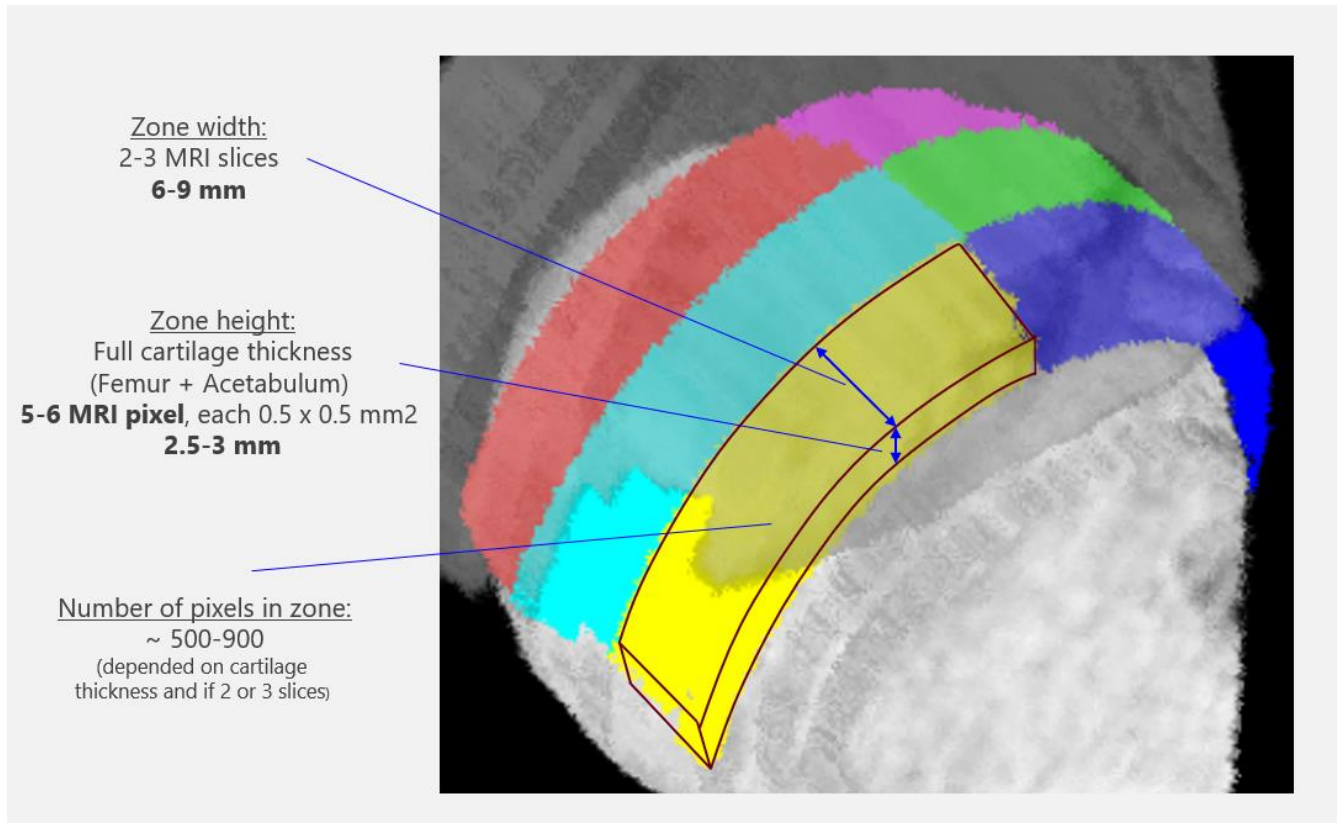

*Figure 3. Cartilage Mapping*
