# Supplementary material for: Periacetabular osteotomy with or without arthroscopic management in patients with hip dysplasia: study protocol for a multicenter randomized controlled trial
Source: Springer Nature journal article supplement (doi:10.1186/s13063-020-04592-9), 2020-08-18
Supplement: MOESM4 [file 18293710]

Date (dd/mmm/yyyy): \_\_\_\_\_ Participant ID: \_\_\_\_\_

## PAO ± Hip Arthroscopy Study

## Appendix D

Time interval: Pre-op

### Patient Information

1. Subject ID: \_\_\_\_\_
2. Operative hip:  Left  Right
3. Sex:  Male  Female
4. Month/year of birth (mmm/yyyy): \_\_\_\_\_

### Patient History

1. Pain location: (check all that apply)  Anterior (groin)  Anterior (thigh)  Lateral  Posterior (buttock)  Other (specify) :
2. Pain chronicity: (select one)  < 6 months  6 months - 1 year  1 - 3 years  3 - 5 years  > 5 years



## PAO ± Hip Arthroscopy Study

Time interval:  Pre-op  2-4 weeks  6 months  12 months  24 months post-op

### Radiographic Finding Digital Measurements

1. Anteroposterior pelvis:  No  Yes  
If yes, answer the following:
- 1) Patient is:  Standing  Supine
- 2) Date of X-ray (dd/mmm/yyyy): \_\_\_\_\_
- 3) Tönnis classification (select one of the following):
- Grade 0 (no signs of osteoarthritis)
  - Grade 1 (increased sclerosis of the head nad acetabulum)
  - Grade 2 (small cysts in the head or acetabulum, moderate joint space narrowing, moderate loss of head sphericity)
  - Grade 3 (large cysts in head or acetabulum, severe joint space narrowing or obliteration, severe deformity of femoral head, evidence of necrosis)
- 4) Lateral center edge angle (Wiberg): \_\_\_\_\_ °
- 5) Acetabular inclination (Tönnis angle): \_\_\_\_\_ °
- 6) Alpha angle: \_\_\_\_\_ °
- 7) Cross over sign:  No  Yes  
If yes, select crossover location below:
- Superior 1/3 of acetabulum
  - Middle 1/3 of acetabulum
  - Inferior 1/3 of acetabulum
- 8) Posterior wall sign:  No  Yes
- 9) Prominence of ischial spin (PRIS) sign:  No  Yes
- 10) Congruency classification (select one of the following):
- Excellent
  - Good
  - Fair
  - Poor
- 

Excellent      Good      Fair      Poor
2. Faux profile view:  No  Yes  
If yes, answer the following:
- 1) Date of X-ray (dd/mmm/yyyy): \_\_\_\_\_
- 2) Anterior roof angle: \_\_\_\_\_ °
- 3) Posterior joint space narrowing:  No  Yes

## PAO ± Hip Arthroscopy Study

### Radiographic Finding Digital Measurements (Continued)

3. Dunn view:  No  Yes

If yes, answer the following:

1)  45° or  90° Dunn

2) Date of X-ray (dd/mmm/yyyy): \_\_\_\_\_

3) Alpha angle: \_\_\_\_\_ °

4. MRI study :  No  Yes

If yes, answer the following:

1) Date of MRI (dd/mmm/yyyy): \_\_\_\_\_

2) Labral tear:  No  Yes

3) Acetabular cyst:  No  Yes

4) Femoral head cyst :  No  Yes

5) Alpha angle at 3 o'clock position: \_\_\_\_\_ °

6) Alpha angle at 130 position: \_\_\_\_\_ °

5. 3D CT scan  No  Yes

If yes, date of scan (dd/mmm/yyyy): \_\_\_\_\_

## PAO ± Hip Arthroscopy Study

**Time interval: Intra-op**

### Surgical procedure

1. Arthroscopy:  No  Yes

If yes, select one of the following:

Beck cartilage damage

- 0 Normal (macroscopically sound cartilage)
- 1 Malacia (roughening of surface, fibrillation)
- 2 Pitting malacia (roughening, partially thinning and full-thickness defects or deep fissuring to the bone)
- 3 Debonding (loss of fixation to the subchondral bone, macroscopically sound cartilage; carpet phenomenon)
- 4 Cleavage (loss of fixation to the subchondral bone; frayed edges, thinning of the cartilage)
- 5 Defect (full-thickness defect)

Labral damage

2. Concurrent procedures (select all that apply):

- |                                                                                |                                                                              |
|--------------------------------------------------------------------------------|------------------------------------------------------------------------------|
| <input type="checkbox"/> Acetabular articular cartilage grafting               | <input type="checkbox"/> Femoral head chondroplasty                          |
| <input type="checkbox"/> Acetabular articular cartilage fixation               | <input type="checkbox"/> Femoral head microfracture                          |
| <input type="checkbox"/> Acetabular chondroplasty                              | <input type="checkbox"/> Femoral head/neck osteochondroplasty                |
| <input type="checkbox"/> Acetabular microfracture                              | <input type="checkbox"/> Labral reconstruction (graft)                       |
| <input type="checkbox"/> Acetabular rim osteoplasty                            | <input type="checkbox"/> Labral recontouring/shrinkage/thermal stabilizatoin |
| <input type="checkbox"/> Adhesiolysis-head neck junction                       | <input type="checkbox"/> Labral refixation/repair                            |
| <input type="checkbox"/> Adhesiolysis-labrocapsular junction                   | <input type="checkbox"/> Labral resection (partial)                          |
| <input type="checkbox"/> Arthroscopic partial capsulectomy                     | <input type="checkbox"/> Labral resection (complete)                         |
| <input type="checkbox"/> Arthotomy                                             | <input type="checkbox"/> Ligamentum teres debridement                        |
| <input type="checkbox"/> Arthroscopic capsular incision/closure (longitudinal) | <input type="checkbox"/> Ligamentum teres repair                             |
| <input type="checkbox"/> Capsular tightening                                   | <input type="checkbox"/> Open arthrotomy                                     |
| <input type="checkbox"/> Femoral head articular cartilage fixation             | <input type="checkbox"/> Psoas lengthening/release                           |
| <input type="checkbox"/> Femoral head articular grafting                       | <input type="checkbox"/> Synovectomy                                         |
| <input type="checkbox"/> Femoral head central resection                        |                                                                              |

3. Subspine (AIIIS) decompression:  No  Yes

4. Duration of surgery from skin incision to wound closure: \_\_\_\_\_ min

5. Transexamic acid:  No  Yes

6. DVT prevention:  No  Yes

If yes, select from the following:

- Xarelto  LMW Heparin  ASA
- Other (specify: \_\_\_\_\_)

## PAO ± Hip Arthroscopy Study

**Time Interval: Track all adverse events within 90 day via retrospective chart review**

**Post-op Adverse Events**

Please use the below grading scheme to indicate post-op adverse events.

| Grade | Definition                                                                                                                                                                                                                                                                                   |
|-------|----------------------------------------------------------------------------------------------------------------------------------------------------------------------------------------------------------------------------------------------------------------------------------------------|
| 1     | <b>Any deviation from the normal postoperative course</b> without the need for pharmacological treatment or surgical, endoscopic and radiological interventions. Allowed therapeutic regimens are: drugs (antiemetics, antipyretics, analgesics, diuretics), electrolytes and physiotherapy. |
| 2     | <b>Requiring pharmacological treatment with drugs</b> other than those allowed for Grade 1 complications. Blood transfusions and total parenteral nutrition are also included.                                                                                                               |
| 3a    | <b>Requiring surgical, endoscopic or radiological</b> intervention (not under general anaesthesia)                                                                                                                                                                                           |
| 3b    | <b>Requiring surgical, endoscopic or radiological</b> intervention (under general anaesthesia)                                                                                                                                                                                               |
| 4a    | <b>Life-threatening complication requiring ICU management</b> (single organ)                                                                                                                                                                                                                 |
| 4b    | <b>Life-threatening complication requiring ICU management</b> (multi organ)                                                                                                                                                                                                                  |
| 5     | <b>Death</b> of a patient                                                                                                                                                                                                                                                                    |

| <u>Adverse events</u>                     | No                       | Yes (select one)         |                          |                          |                          |                          |                          |                          |
|-------------------------------------------|--------------------------|--------------------------|--------------------------|--------------------------|--------------------------|--------------------------|--------------------------|--------------------------|
|                                           |                          | 1                        | 2                        | 3a                       | 3b                       | 4a                       | 4b                       | 5                        |
| 1. Airway/breathing                       | <input type="checkbox"/> | <input type="checkbox"/> | <input type="checkbox"/> | <input type="checkbox"/> | <input type="checkbox"/> | <input type="checkbox"/> | <input type="checkbox"/> | <input type="checkbox"/> |
| 2. Cardiac arrest/failure/arrhythmia      | <input type="checkbox"/> | <input type="checkbox"/> | <input type="checkbox"/> | <input type="checkbox"/> | <input type="checkbox"/> | <input type="checkbox"/> | <input type="checkbox"/> | <input type="checkbox"/> |
| 3. Compartment syndrome                   | <input type="checkbox"/> | <input type="checkbox"/> | <input type="checkbox"/> | <input type="checkbox"/> | <input type="checkbox"/> | <input type="checkbox"/> | <input type="checkbox"/> | <input type="checkbox"/> |
| 4. Cutaneous injury (e.g., pressure sore) | <input type="checkbox"/> | <input type="checkbox"/> | <input type="checkbox"/> | <input type="checkbox"/> | <input type="checkbox"/> | <input type="checkbox"/> | <input type="checkbox"/> | <input type="checkbox"/> |
| 5. Delirium/altered mental status         | <input type="checkbox"/> | <input type="checkbox"/> | <input type="checkbox"/> | <input type="checkbox"/> | <input type="checkbox"/> | <input type="checkbox"/> | <input type="checkbox"/> | <input type="checkbox"/> |
| 6. Dysphagia/dysphonia                    | <input type="checkbox"/> | <input type="checkbox"/> | <input type="checkbox"/> | <input type="checkbox"/> | <input type="checkbox"/> | <input type="checkbox"/> | <input type="checkbox"/> | <input type="checkbox"/> |
| 7. Fall                                   | <input type="checkbox"/> | <input type="checkbox"/> | <input type="checkbox"/> | <input type="checkbox"/> | <input type="checkbox"/> | <input type="checkbox"/> | <input type="checkbox"/> | <input type="checkbox"/> |
| 8. GI bleed                               | <input type="checkbox"/> | <input type="checkbox"/> | <input type="checkbox"/> | <input type="checkbox"/> | <input type="checkbox"/> | <input type="checkbox"/> | <input type="checkbox"/> | <input type="checkbox"/> |
| 9. Hematoma                               | <input type="checkbox"/> | <input type="checkbox"/> | <input type="checkbox"/> | <input type="checkbox"/> | <input type="checkbox"/> | <input type="checkbox"/> | <input type="checkbox"/> | <input type="checkbox"/> |
| 10. Ileus/bowel obstruction               | <input type="checkbox"/> | <input type="checkbox"/> | <input type="checkbox"/> | <input type="checkbox"/> | <input type="checkbox"/> | <input type="checkbox"/> | <input type="checkbox"/> | <input type="checkbox"/> |
| 11. Implant/instrumentation related:      |                          |                          |                          |                          |                          |                          |                          |                          |
| a. Loss of reduction/alignment/correction | <input type="checkbox"/> | <input type="checkbox"/> | <input type="checkbox"/> | <input type="checkbox"/> | <input type="checkbox"/> | <input type="checkbox"/> | <input type="checkbox"/> | <input type="checkbox"/> |
| b. Peri-implant fracture                  | <input type="checkbox"/> | <input type="checkbox"/> | <input type="checkbox"/> | <input type="checkbox"/> | <input type="checkbox"/> | <input type="checkbox"/> | <input type="checkbox"/> | <input type="checkbox"/> |
| c. Joint instability/dislocation          | <input type="checkbox"/> | <input type="checkbox"/> | <input type="checkbox"/> | <input type="checkbox"/> | <input type="checkbox"/> | <input type="checkbox"/> | <input type="checkbox"/> | <input type="checkbox"/> |
| d. Aseptic loosening                      | <input type="checkbox"/> | <input type="checkbox"/> | <input type="checkbox"/> | <input type="checkbox"/> | <input type="checkbox"/> | <input type="checkbox"/> | <input type="checkbox"/> | <input type="checkbox"/> |
| 12. Infection:                            |                          |                          |                          |                          |                          |                          |                          |                          |
| a. Superficial wound                      | <input type="checkbox"/> | <input type="checkbox"/> | <input type="checkbox"/> | <input type="checkbox"/> | <input type="checkbox"/> | <input type="checkbox"/> | <input type="checkbox"/> | <input type="checkbox"/> |
| b. Deep wound                             | <input type="checkbox"/> | <input type="checkbox"/> | <input type="checkbox"/> | <input type="checkbox"/> | <input type="checkbox"/> | <input type="checkbox"/> | <input type="checkbox"/> | <input type="checkbox"/> |
| c. Urinary tract                          | <input type="checkbox"/> | <input type="checkbox"/> | <input type="checkbox"/> | <input type="checkbox"/> | <input type="checkbox"/> | <input type="checkbox"/> | <input type="checkbox"/> | <input type="checkbox"/> |
| d. Systemic                               | <input type="checkbox"/> | <input type="checkbox"/> | <input type="checkbox"/> | <input type="checkbox"/> | <input type="checkbox"/> | <input type="checkbox"/> | <input type="checkbox"/> | <input type="checkbox"/> |
| 13. Myocardial infarction                 | <input type="checkbox"/> | <input type="checkbox"/> | <input type="checkbox"/> | <input type="checkbox"/> | <input type="checkbox"/> | <input type="checkbox"/> | <input type="checkbox"/> | <input type="checkbox"/> |

## PAO ± Hip Arthroscopy Study

| Post-op Adverse Events (Continued)             |                          |                          |                          |                          |                          |                          |                          |
|------------------------------------------------|--------------------------|--------------------------|--------------------------|--------------------------|--------------------------|--------------------------|--------------------------|
| 14. Neurological deterioration:                |                          |                          |                          |                          |                          |                          |                          |
| a. Sciatic nerve                               | <input type="checkbox"/> | <input type="checkbox"/> | <input type="checkbox"/> | <input type="checkbox"/> | <input type="checkbox"/> | <input type="checkbox"/> | <input type="checkbox"/> |
| b. Femoral nerve                               | <input type="checkbox"/> | <input type="checkbox"/> | <input type="checkbox"/> | <input type="checkbox"/> | <input type="checkbox"/> | <input type="checkbox"/> | <input type="checkbox"/> |
| c. Obturator nerve                             | <input type="checkbox"/> | <input type="checkbox"/> | <input type="checkbox"/> | <input type="checkbox"/> | <input type="checkbox"/> | <input type="checkbox"/> | <input type="checkbox"/> |
| d. Lateral femoral cutaneous nerve             | <input type="checkbox"/> | <input type="checkbox"/> | <input type="checkbox"/> | <input type="checkbox"/> | <input type="checkbox"/> | <input type="checkbox"/> | <input type="checkbox"/> |
| f. Pudendal nerve                              | <input type="checkbox"/> | <input type="checkbox"/> | <input type="checkbox"/> | <input type="checkbox"/> | <input type="checkbox"/> | <input type="checkbox"/> | <input type="checkbox"/> |
| 15. Non-union/mal union:                       |                          |                          |                          |                          |                          |                          |                          |
| a. Ilium                                       | <input type="checkbox"/> | <input type="checkbox"/> | <input type="checkbox"/> | <input type="checkbox"/> | <input type="checkbox"/> | <input type="checkbox"/> | <input type="checkbox"/> |
| b. Ischium                                     | <input type="checkbox"/> | <input type="checkbox"/> | <input type="checkbox"/> | <input type="checkbox"/> | <input type="checkbox"/> | <input type="checkbox"/> | <input type="checkbox"/> |
| c. Pubis                                       | <input type="checkbox"/> | <input type="checkbox"/> | <input type="checkbox"/> | <input type="checkbox"/> | <input type="checkbox"/> | <input type="checkbox"/> | <input type="checkbox"/> |
| 16. Pain - new onset                           |                          |                          |                          |                          |                          |                          |                          |
| 17. Pneumonia                                  |                          |                          |                          |                          |                          |                          |                          |
| 18. Renal insufficiency                        |                          |                          |                          |                          |                          |                          |                          |
| 19. Thrombolytic event:                        |                          |                          |                          |                          |                          |                          |                          |
| a. DVT                                         | <input type="checkbox"/> | <input type="checkbox"/> | <input type="checkbox"/> | <input type="checkbox"/> | <input type="checkbox"/> | <input type="checkbox"/> | <input type="checkbox"/> |
| b. PE                                          | <input type="checkbox"/> | <input type="checkbox"/> | <input type="checkbox"/> | <input type="checkbox"/> | <input type="checkbox"/> | <input type="checkbox"/> | <input type="checkbox"/> |
| 20. Soft tissue reconstruction/repair fracture |                          |                          |                          |                          |                          |                          |                          |
| 21. Wound dehiscence                           |                          |                          |                          |                          |                          |                          |                          |
| 22. Wound drainage:                            |                          |                          |                          |                          |                          |                          |                          |
| a. Serous (requiring treatment)                | <input type="checkbox"/> | <input type="checkbox"/> | <input type="checkbox"/> | <input type="checkbox"/> | <input type="checkbox"/> | <input type="checkbox"/> | <input type="checkbox"/> |

24. How many days longer than expected did this patient stay in hospital due to adverse events (provide #): \_\_\_\_\_ day(s)

25. Did complications require :

- Not applicable
- Revision
- Reoperation
- Readmission

26. Treatment (select all that apply, and provide date of treatment) :

- |                                           |                |
|-------------------------------------------|----------------|
| <input type="checkbox"/> Arthroscopy      | Date: _____    |
| <input type="checkbox"/> Hardware removal | Date: _____    |
| <input type="checkbox"/> Bone excision    | Date: _____    |
| <input type="checkbox"/> Hip replacement  | Date: _____    |
| <input type="checkbox"/> Wound I&D        | Date: _____    |
| <input type="checkbox"/> Other            | Specify: _____ |
|                                           | Date: _____    |

27. Other notes:
