# Supplementary material for: Periacetabular osteotomy with or without arthroscopic management in patients with hip dysplasia: study protocol for a multicenter randomized controlled trial
Source: Springer Nature journal article supplement (doi:10.1186/s13063-020-04592-9), 2020-08-18
Supplement: MOESM5 [file 18293710]

APPENDIX 1

International Hip Outcome Tool (iHOT-33).

The header graphic for the iHOT-33 tool is a dark grey rectangle. On the left, the text 'iHOT<sup>33</sup>' is written in large white font, with 'INTERNATIONAL HIP OUTCOME TOOL' in smaller white font below it. To the right, there are three white input fields: 'NAME', 'DATE OF BIRTH', and 'TODAY'S DATE'. Further right, a white box titled 'WHICH HIP IS THIS SURVEY ABOUT?' contains the instruction: 'If we've asked you to tell us about one hip in particular, tick that. Otherwise, tick the one which causes most trouble.' Below this are two radio button options: 'Left' and 'Right'.

QUALITY OF LIFE QUESTIONNAIRE FOR YOUNG, ACTIVE PEOPLE WITH HIP PROBLEMS

INSTRUCTIONS

- These questions ask about the problems you may be experiencing in your hip, how these problems affect your life, and the emotions you may feel because of these problems.
- Please indicate the severity by marking the line below each question with a slash.
  - » If you put a mark on the far **left**, it means that you **feel you are significantly impaired**. For example:

SIGNIFICANTLY IMPAIRED \_\_\_\_\_ NO PROBLEMS AT ALL

- » If you put a mark on the far **right**, it means that you **do not think that you have any problems** with your hip. For example:

SIGNIFICANTLY IMPAIRED \_\_\_\_\_ NO PROBLEMS AT ALL

- » If the mark is placed in the middle of the line, this indicates that you are moderately disabled, or in other words, between the extremes of 'significantly impaired' and 'no problems at all'. It is important to put your mark at either end of the line if the extreme descriptions accurately reflect your situation.

**TIP** If you don't do an activity, imagine how your hip would feel if you had to try it.

- Please let your answers describe the typical situation in the last **month**.

SECTION 1 | SYMPTOMS AND FUNCTIONAL LIMITATIONS

The following questions ask about symptoms that you may experience in your hip and about the function of your hip with respect to daily activities. Please think about how you have felt most of the time over the past month and answer accordingly.

Q01 How often does your hip/groin ache?

CONSTANTLY \_\_\_\_\_ NEVER

Q02 How stiff is your hip as a result of sitting/resting during the day?

EXTREMELY STIFF \_\_\_\_\_ NOT STIFF AT ALL

.....  
**Q03** How difficult is it for you to walk long distances?

EXTREMELY DIFFICULT \_\_\_\_\_ NOT DIFFICULT AT ALL

.....  
**Q04** How much pain do you have in your hip while sitting?

EXTREME PAIN \_\_\_\_\_ NO PAIN AT ALL

.....  
**Q05** How much trouble do you have standing on your feet for long periods of time?

SEVERE TROUBLE \_\_\_\_\_ NO TROUBLE AT ALL

.....  
**Q06** How difficult is it for you to get up and down off the floor/ground?

EXTREMELY DIFFICULT \_\_\_\_\_ NOT DIFFICULT AT ALL

.....  
**Q07** How difficult is it for you to walk on uneven surfaces?

EXTREMELY DIFFICULT \_\_\_\_\_ NOT DIFFICULT AT ALL

.....  
**Q08** How difficult is it for you to lie on your affected hip side?

EXTREMELY DIFFICULT \_\_\_\_\_ NOT DIFFICULT AT ALL

.....  
**Q09** How much trouble do you have with stepping over obstacles?

SEVERE TROUBLE \_\_\_\_\_ NO TROUBLE AT ALL

.....  
**Q10** How much trouble do you have with climbing up/down stairs?

SEVERE TROUBLE \_\_\_\_\_ NO TROUBLE AT ALL

.....  
**Q11** How much trouble do you have with rising from a sitting position?

SEVERE TROUBLE \_\_\_\_\_ NO TROUBLE AT ALL

.....  
**Q12** How much discomfort do you have with taking long strides?

EXTREME DISCOMFORT \_\_\_\_\_ NO DISCOMFORT AT ALL

.....

**Q13** How much difficulty do you have with getting into and/or out of a car?

EXTREME DIFFICULTY \_\_\_\_\_ NO DIFFICULTY AT ALL

.....

**Q14** How much trouble do you have with grinding, catching or clicking in your hip?

SEVERE TROUBLE \_\_\_\_\_ NO TROUBLE AT ALL

.....

**Q15** How much difficulty do you have with putting on/taking off socks, stockings or shoes?

EXTREME DIFFICULTY \_\_\_\_\_ NO DIFFICULTY AT ALL

.....

**Q16** Overall, how much pain do you have in your hip/groin?

EXTREME PAIN \_\_\_\_\_ NO PAIN AT ALL

## SECTION 2 | SPORTS AND RECREATIONAL ACTIVITIES

The following questions ask about your **hip** when you participate in sports and recreational activities. Please think about how you have felt most of the time over the past **month** and answer accordingly.

.....

**Q17** How concerned are you about your ability to maintain your desired fitness level?

EXTREMELY CONCERNED \_\_\_\_\_ NOT CONCERNED AT ALL

.....

**Q18** How much pain do you experience in your hip after activity?

EXTREME PAIN \_\_\_\_\_ NO PAIN AT ALL

.....

**Q19** How concerned are you that the pain in your hip will increase if you participate in sports or recreational activities?

EXTREMELY CONCERNED \_\_\_\_\_ NOT CONCERNED AT ALL

.....

**Q20** How much has your quality of life deteriorated because you cannot participate in sport/recreational activities?

EXTREMELY DETERIORATED \_\_\_\_\_ NOT DETERIORATED AT ALL

.....

**Q21** How concerned are you about cutting/changing directions during your sport or recreational activities?

I do not do this action in my activities

EXTREMELY  
CONCERNED

NOT CONCERNED  
AT ALL

.....

**Q22** How much has your performance level decreased in your sport or recreational activities?

EXTREMELY  
DECREASED

NOT DECREASED  
AT ALL

### SECTION 3 | JOB RELATED CONCERNS

The following questions relate to your hip with respect to your current work. Please think about how you have felt most of the time over the past month and answer accordingly.

I do not work because of my hip (*please skip section*)

I do not work for reasons other than my hip (*please skip section*)

.....

**Q23** How much trouble do you have pushing, pulling, lifting or carrying heavy objects at work?

I do not do these actions in my activities

SEVERE TROUBLE

NO TROUBLE AT  
ALL

.....

**Q24** How much trouble do you have with crouching/squatting?

SEVERE TROUBLE

NO TROUBLE AT  
ALL

.....

**Q25** How concerned are you that your job will make your hip worse?

EXTREMELY  
CONCERNED

NOT CONCERNED  
AT ALL

.....

**Q26** How much difficulty do you have at work because of reduced hip mobility?

EXTREME  
DIFFICULTY

NO DIFFICULTY  
AT ALL

**SECTION 4 | SOCIAL, EMOTIONAL AND LIFESTYLE CONCERNS**

The following questions ask about social, emotional and lifestyle concerns that you may feel with respect to your hip problem. Please think about how you have felt most of the time over the past month and answer accordingly.

.....

**Q27** How frustrated are you because of your hip problem?

EXTREMELY FRUSTRATED \_\_\_\_\_ NOT FRUSTRATED AT ALL

.....

**Q28** How much trouble do you have with sexual activity because of your hip?

This is not relevant to me

SEVERE TROUBLE \_\_\_\_\_ NO TROUBLE AT ALL

.....

**Q29** How much of a distraction is your hip problem?

EXTREME DISTRACTION \_\_\_\_\_ NO DISTRACTION AT ALL

.....

**Q30** How difficult is it for you to release tension and stress because of your hip problem?

EXTREMELY DIFFICULT \_\_\_\_\_ NOT DIFFICULT AT ALL

.....

**Q31** How discouraged are you because of your hip problem?

EXTREMELY DISCOURAGED \_\_\_\_\_ NOT DISCOURAGED AT ALL

.....

**Q32** How concerned are you about picking up or carrying children because of your hip?

I do not do this action in my activities

EXTREMELY CONCERNED \_\_\_\_\_ NOT CONCERNED AT ALL

.....

**Q33** How much of the time are you aware of the disability in your hip?

CONSTANTLY AWARE \_\_\_\_\_ NOT AWARE AT ALL
