# Supplementary material for: Periacetabular osteotomy with or without arthroscopic management in patients with hip dysplasia: study protocol for a multicenter randomized controlled trial
Source: Springer Nature journal article supplement (doi:10.1186/s13063-020-04592-9), 2020-08-18
Supplement: MOESM6 [file 18293710]

# Appendix F

## PROMIS Global Health 10

Date: \_\_\_\_\_ Participant ID: \_\_\_\_\_ Time interval: \_\_\_\_\_

Please respond to each item by marking one box per question

|                                                                                                                                                                                                                                   | Excellent                | Very good                | Good                     | Fair                     | Poor                         |
|-----------------------------------------------------------------------------------------------------------------------------------------------------------------------------------------------------------------------------------|--------------------------|--------------------------|--------------------------|--------------------------|------------------------------|
| In general, would you say your health is:                                                                                                                                                                                         | <input type="checkbox"/> | <input type="checkbox"/> | <input type="checkbox"/> | <input type="checkbox"/> | <input type="checkbox"/>     |
| In general, would you say your quality of life is:                                                                                                                                                                                | <input type="checkbox"/> | <input type="checkbox"/> | <input type="checkbox"/> | <input type="checkbox"/> | <input type="checkbox"/>     |
| In general, how would you rate your physical health?                                                                                                                                                                              | <input type="checkbox"/> | <input type="checkbox"/> | <input type="checkbox"/> | <input type="checkbox"/> | <input type="checkbox"/>     |
| In general, how would you rate your mental health, including your mood and your ability to think?                                                                                                                                 | <input type="checkbox"/> | <input type="checkbox"/> | <input type="checkbox"/> | <input type="checkbox"/> | <input type="checkbox"/>     |
| In general, how would you rate your satisfaction with your social activities and relationships?                                                                                                                                   | <input type="checkbox"/> | <input type="checkbox"/> | <input type="checkbox"/> | <input type="checkbox"/> | <input type="checkbox"/>     |
| In general, please rate how well you carry out your usual social activities and roles. (This includes activities at home, at work and in your community, and responsibilities as a parent, child, spouse, employee, friend, etc.) | <input type="checkbox"/> | <input type="checkbox"/> | <input type="checkbox"/> | <input type="checkbox"/> | <input type="checkbox"/>     |
|                                                                                                                                                                                                                                   | <b>Completely</b>        | <b>Mostly</b>            | <b>Moderately</b>        | <b>A Little</b>          | <b>Not At All</b>            |
| To what extent are you able to carry out your everyday physical activities such as walking, climbing stairs, carrying groceries, or moving a chair?                                                                               | <input type="checkbox"/> | <input type="checkbox"/> | <input type="checkbox"/> | <input type="checkbox"/> | <input type="checkbox"/>     |
| <b>In the past 7 days</b>                                                                                                                                                                                                         | <b>Never</b>             | <b>Rarely</b>            | <b>Sometimes</b>         | <b>Often</b>             | <b>Always</b>                |
| How often have you been bothered by emotional problems such as feeling anxious, depressed or irritated?                                                                                                                           | <input type="checkbox"/> | <input type="checkbox"/> | <input type="checkbox"/> | <input type="checkbox"/> | <input type="checkbox"/>     |
|                                                                                                                                                                                                                                   | <b>None</b>              | <b>Mild</b>              | <b>Moderate</b>          | <b>Severe</b>            | <b>Very Severe</b>           |
| How would you rate your fatigue on average?                                                                                                                                                                                       | <input type="checkbox"/> | <input type="checkbox"/> | <input type="checkbox"/> | <input type="checkbox"/> | <input type="checkbox"/>     |
| How would you rate your pain on average?                                                                                                                                                                                          | <input type="checkbox"/> | <input type="checkbox"/> | <input type="checkbox"/> | <input type="checkbox"/> | <input type="checkbox"/>     |
|                                                                                                                                                                                                                                   | <b>No Pain</b>           |                          |                          |                          | <b>Worst Imaginable Pain</b> |
