# Supplementary material for: Periacetabular osteotomy with or without arthroscopic management in patients with hip dysplasia: study protocol for a multicenter randomized controlled trial
Source: Springer Nature journal article supplement (doi:10.1186/s13063-020-04592-9), 2020-08-18
Supplement: MOESM8 [file 18293710]

Appendix H

Figure 4. Schedule of enrolment, interventions, and assessments

| Timepoint                                                                     | Study Period |            |                                |          |           |           |   |
|-------------------------------------------------------------------------------|--------------|------------|--------------------------------|----------|-----------|-----------|---|
|                                                                               | Enrolment    | Allocation | Post-Allocation (Post-Surgery) |          |           |           |   |
|                                                                               | Pre Surgery  | Surgery    | 90-day                         | 6 Months | 12 Months | 24 Months |   |
| <b>Enrolment</b>                                                              | X            |            |                                |          |           |           |   |
| <b>Eligibility screen</b>                                                     | X            |            |                                |          |           |           |   |
| <b>Informed Consent</b>                                                       | X            |            |                                |          |           |           |   |
| <b>Allocation</b>                                                             |              | X          |                                |          |           |           |   |
| <b>Interventions</b>                                                          |              |            |                                |          |           |           |   |
| <b>PAO with or without scope</b>                                              |              |            | X                              |          |           |           |   |
| <b>Assessments</b>                                                            |              |            |                                |          |           |           |   |
| Patient reported quality of life (iHOT-33)                                    | X            |            |                                |          | X         | X         | X |
| Performance Measures (Four Square Step Test and Sit-to-Stand five times test) | X            |            |                                |          | X         | X         | X |
| Health related quality of life (PROMIS Global 10)                             | X            |            |                                |          | X         | X         | X |
| Cartilage Quality (T1rho MRI)                                                 | X            |            |                                |          |           |           | X |
| Adverse Events (Sink Classification System)                                   |              |            |                                | X        |           |           |   |
| Reoperation/Failure Mode (Standardized failure mode)                          |              |            |                                |          |           | X         | X |
| Work productivity (WPAI: SHP)                                                 |              |            |                                |          | X         | X         | X |
