# Supplementary material for: Periacetabular osteotomy with or without arthroscopic management in patients with hip dysplasia: study protocol for a multicenter randomized controlled trial
Source: Springer Nature journal article supplement (doi:10.1186/s13063-020-04592-9), 2020-08-18
Supplement: MOESM10 [file 18293710]

**Appendix J**

Table 2. Study Gantt Chart

| Event                                    | Year 1 |       | Year 2 |       | Year 3 |       | Year 4 |       | Year 5 |       |
|------------------------------------------|--------|-------|--------|-------|--------|-------|--------|-------|--------|-------|
|                                          | Q1/Q2  | Q3/Q4 | Q1/Q2  | Q3/Q4 | Q1/Q2  | Q3/Q4 | Q1/Q2  | Q3/Q4 | Q1/Q2  | Q3/Q4 |
| <b>Research Ethics Board</b>             |        |       |        |       |        |       |        |       |        |       |
| <b>Recruitment and Consent</b>           |        |       |        |       |        |       |        |       |        |       |
| <b>Patient Follow-up</b>                 |        |       |        |       |        |       |        |       |        |       |
| <b>Cost Utility Analysis</b>             |        |       |        |       |        |       |        |       |        |       |
| <b>Interim &amp; Final Data Analysis</b> |        |       |        |       |        |       |        |       |        |       |
| <b>Knowledge Translation</b>             |        |       |        |       |        |       |        |       |        |       |
